# Supplementary material for: Prevalence of Psychopathological Symptoms and Their Determinants in Four Healthcare Workers’ Categories during the Second Year of COVID-19 Pandemic
Source: MDPI journal article supplement (doi:10.3390/ijerph192013712), 2022-10-21
Supplement: s1 [file s1]

**File S1**  
**The COVID-19 Survey**

**1. Write your age in numbers below (es. 45)**

---

**2. Select your sex:**

- ☐ Man
- ☐ Women

**3. Select your current marital status:**

- ☐ Single
- ☐ In a relationship
- ☐ Married
- ☐ Separated or Divorced
- ☐ Widowed

**4. Write your current employment:**

---

**5. Select your employment contract:**

- ☐ Permanent contract
- ☐ Fixed-term contract
- ☐ Stand-in assignment
- ☐ Volunteering
- ☐ Other: \_\_\_\_\_

**6. Do you suffer from one or more organic disease/s? Select one or more options from the list below if and only if you have one or more medical diagnosis/es:**

- ☐ No, I do not suffer from an organic disease
- ☐ Yes, I suffer from respiratory system disease/s (e.g. asthma, chronic obstructive pulmonary disease, etc.)
- ☐ Yes, I suffer from immune system disease/s (e.g. thyroiditis, psoriasis, rheumatoid arthritis, etc.)
- ☐ Yes, I suffer from oncologic disease/s
- ☐ Yes, I suffer from metabolic disease/s (e.g. diabetes, gout, obesity, etc.)
- ☐ Yes, I suffer from liver disease/s (e.g. hepatitis, cirrhosis, etc.)
- ☐ Yes, I suffer from kidney disease/s
- ☐ Yes, I suffer from cardiovascular disease/s
- ☐ Yes, I suffer from psychiatric disease/s
- ☐ Yes, I suffer from other disease/s: \_\_\_\_\_

**7. Are you implementing any strategy to protect your family from COVID-19 infection?**

- ☐ Yes, I live away from home or my family live away from home (i.e. hotel room)
- ☐ Yes, I stay in a separated room in the same house
- ☐ Yes, I use PPE at home
- ☐ No, I cannot implement any strategy at home
- ☐ No, I think there is no more reason to do this
- ☐ Other: \_\_\_\_\_

**8. Have you ever been tested positive to COVID-19 swab?**

- ☐ Yes, I am positive right now
- ☐ Yes, I have, but now I am negative
- ☐ No, I have not

**9. Have you got the COVID-19 vaccination?**

- ☐ Yes, I have
- ☐ No, I have not

**10. How scared do you feel about contracting COVID-19 after the vaccination? Move the bar on the line between 0 (No scared at all) to 100 (Extremely scared):**

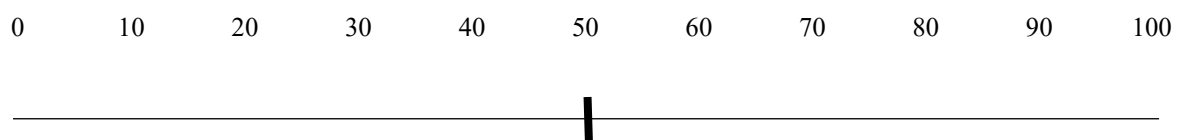

**11. Have you ever thought about starting a psychological support since the COVID-19 pandemic beginning?**

- No, I have never thought about that
- Yes, I have, but I do not have started it yet
- Yes, and I have started a psychological support

**12. Have you been working in shifts since the start of the pandemic?**

- ☐ Yes
- ☐ No

**13. Have you worked in a COVID-19 ward since the start of the pandemic?**

- Yes, but only during the first wave (March-June 2020)
- Yes, but only during the second wave (September-December 2020)
- Yes, I am still working in a COVID-19 ward
- No, I have never worked in a COVID-19 ward

**14. How much COVID-19 is still impacting your daily work activities?**

- Not at all
- A little bit
- Moderately
- Quite a bit
- Extremely

**15. How much COVID-19 is still impacting your daily work activities? We provide you several reasons. For each one, move the bar on the line between 0 (Strongly disagree) to 100 (strongly agree)**

| 1 | Bureaucracy increased                                          | <p>A horizontal line graph with a scale from 0 to 100 in increments of 10. A vertical tick mark is placed at the 50 position.</p> |
|---|----------------------------------------------------------------|-----------------------------------------------------------------------------------------------------------------------------------|
| 2 | Extended working hours                                         | <p>A horizontal line graph with a scale from 0 to 100 in increments of 10. A vertical tick mark is placed at the 50 position.</p> |
| 3 | More pressure or demands                                       | <p>A horizontal line graph with a scale from 0 to 100 in increments of 10. A vertical tick mark is placed at the 50 position.</p> |
| 4 | Tense working mood                                             | <p>A horizontal line graph with a scale from 0 to 100 in increments of 10. A vertical tick mark is placed at the 50 position.</p> |
| 5 | Lack of contact and support from both colleagues and superiors | <p>A horizontal line graph with a scale from 0 to 100 in increments of 10. A vertical tick mark is placed at the 50 position.</p> |
| 6 | Lack of recreative activities after work                       | <p>A horizontal line graph with a scale from 0 to 100 in increments of 10. A vertical tick mark is placed at the 50 position.</p> |

|    |                                                                                                                        |  |
|----|------------------------------------------------------------------------------------------------------------------------|--|
| 7  | Increased family burden                                                                                                |  |
| 8  | Clinical different opinions about patients' treatments                                                                 |  |
| 9  | Prolonged PPE used                                                                                                     |  |
| 10 | Routineous work                                                                                                        |  |
| 11 | Lack of information and involvement in clinical decisions                                                              |  |
| 12 | Greater responsibilities and risks in dealing with COVID-19 patients                                                   |  |
| 13 | Lack of psychological and emotional support from extra-working context (i.e. family, friends, significant other, etc.) |  |

**16. Looking to the future, how much confidence do you feel towards...**

|   |                                                                 | <b>Not at all</b> | <b>A little bit</b> | <b>Moderately</b> | <b>Quite a bit</b> | <b>Extremely</b> |
|---|-----------------------------------------------------------------|-------------------|---------------------|-------------------|--------------------|------------------|
| 1 | ...the Italian healthcare system                                |                   |                     |                   |                    |                  |
| 2 | ...your job perspectives                                        |                   |                     |                   |                    |                  |
| 3 | ...your perspective other than job (i.e. family, friends, etc.) |                   |                     |                   |                    |                  |
| 4 | ...the Italian socioeconomic situation                          |                   |                     |                   |                    |                  |

**17. I feel...by patients**

- ☐ Loved
- ☐ Appreciated
- ☐ Ignored
- ☐ Rejected
- ☐ Assaulted
- ☐ Other: \_\_\_\_\_

**18. I feel...by patients' families**

- ☐ Loved
- ☐ Appreciated
- ☐ Ignored
- ☐ Rejected
- ☐ Assaulted
- ☐ Other: \_\_\_\_\_

**19. I feel...by my family**

- ☐ Loved
- ☐ Appreciated
- ☐ Ignored
- ☐ Rejected
- ☐ Assaulted
- ☐ Other: \_\_\_\_\_

**20. I feel...by my friends**

- ☐ Loved
- ☐ Appreciated
- ☐ Ignored
- ☐ Rejected
- ☐ Assaulted
- ☐ Other: \_\_\_\_\_

**21. I feel...by my neighbors**

- ☐ Loved
- ☐ Appreciated
- ☐ Ignored
- ☐ Rejected
- ☐ Assaulted
- ☐ Other: \_\_\_\_\_

**22. I feel...by the public opinion**

- ☐ Loved
- ☐ Appreciated
- ☐ Ignored
- ☐ Rejected
- ☐ Assaulted
- ☐ Other: \_\_\_\_\_

**23. How much does the judgments of...affects you?**

|   |                        | <b>Not at<br/>all</b> | <b>A little<br/>bit</b> | <b>Moderately</b> | <b>Quite a<br/>bit</b> | <b>Extremely</b> |
|---|------------------------|-----------------------|-------------------------|-------------------|------------------------|------------------|
| 1 | The patients           |                       |                         |                   |                        |                  |
| 2 | The patients' families |                       |                         |                   |                        |                  |
| 3 | Your family            |                       |                         |                   |                        |                  |
| 4 | Your friends           |                       |                         |                   |                        |                  |
| 5 | Your neighbors         |                       |                         |                   |                        |                  |
| 6 | The public opinion     |                       |                         |                   |                        |                  |
