# Supplementary material for: Prevalence of Psychopathological Symptoms and Their Determinants in Four Healthcare Workers’ Categories during the Second Year of COVID-19 Pandemic
Source: MDPI journal article supplement (doi:10.3390/ijerph192013712), 2022-10-21
Supplement: s1 [file s1]

## Supplementary Materials

**Table S1.** Psychological symptoms: cutoff frequencies

|                                               |          | <b>Physicians<br/>(n = 265)</b> | <b>Nurses<br/>(n = 176)</b> | <b>Other healthcare<br/>professionals<br/>(n = 184)</b> | <b>Administrative<br/>staff<br/>(n = 48)</b> | <b>p</b> |
|-----------------------------------------------|----------|---------------------------------|-----------------------------|---------------------------------------------------------|----------------------------------------------|----------|
| <b>PHQ-4<br/>(Symptoms of<br/>Depression)</b> | Absent   | 223<br>(40,33%)                 | 139<br>(25,14%)             | 154 (27,85%)                                            | 37 (6,69%)                                   | 0,415    |
|                                               | Present  | 41 (34,75%)                     | 37 (31,36%)                 | 30 (25,42%)                                             | 10 (8,47%)                                   |          |
| <b>PHQ-4<br/>(Symptoms of<br/>Anxiety)</b>    | Absent   | 192<br>(37,65%)                 | 138<br>(27,06%)             | 141 (27,65%)                                            | 39 (7,65%)                                   | 0,333    |
|                                               | Present  | 72 (44,72%)                     | 38 (23,6%)                  | 43 (26,71%)                                             | 8 (4,97%)                                    |          |
| <b>IES-R</b>                                  | Absent   | 141<br>(35,07%)                 | 118<br>(29,35%)             | 115 (28,61%)                                            | 28 (6,97%)                                   | 0.181    |
|                                               | Mild     | 49 (44,95%)                     | 29 (26,61%)                 | 24 (22,02%)                                             | 7 (6,42%)                                    |          |
|                                               | Moderate | 14 (41,18%)                     | 8 (23,53%)                  | 9 (26,47%)                                              | 3 (8,82%)                                    |          |
|                                               | Severe   | 60 (47,62%)                     | 21 (16,67%)                 | 36 (28,57%)                                             | 9 (7,14%)                                    |          |

**Table S2.** Symptoms of depression (PHQ-2) stepwise regression analysis

| <i>Physicians</i>                                                              | <b><math>\beta</math></b> | <b>SE</b> | <b>p-value</b> |
|--------------------------------------------------------------------------------|---------------------------|-----------|----------------|
| Perceived stress during the last two weeks                                     | 0,024                     | 0,003     | <.0001         |
| Job satisfaction during the last two weeks                                     | -0,015                    | 0,003     | <.0001         |
| Psychological support since COVID-19 pandemic beginning (yes)                  | 0,285                     | 0,116     | 0.0246         |
| <i>Nurses</i>                                                                  |                           |           |                |
|                                                                                | <b><math>\beta</math></b> | <b>SE</b> | <b>p-value</b> |
| Perceived stress during the last two weeks                                     | 0,013                     | 0,004     | 0.0003         |
| Job satisfaction during the last two weeks                                     | -0,016                    | 0,004     | 0.0003         |
| Routinely working                                                              | 0,007                     | 0,003     | 0.0100         |
| Lack of psychological and emotional support from both colleagues and superiors | 0,012                     | 0,003     | 0.0110         |
| Impact of patients judgement on work                                           | 0,220                     | 0,075     | 0.0471         |
| <i>Other Healthcare Professionals</i>                                          |                           |           |                |
|                                                                                | <b><math>\beta</math></b> | <b>SE</b> | <b>p-value</b> |
| Perceived stress during the last two weeks                                     | 0,018                     | 0,003     | <.0001         |
| Job satisfaction during the last two weeks                                     | -0,013                    | 0,004     | 0.0007         |
| Lack of psychological and emotional support from both colleagues and superiors | 0,007                     | 0,003     | 0.0011         |
| Trust in self-perspective other than work (i.e. family, friends, etc.)         | -0,275                    | 0,102     | 0.0485         |
| Impact of public opinion judgement on work                                     | 0,242                     | 0,077     | 0.0132         |
| <i>Administrative staff</i>                                                    |                           |           |                |
|                                                                                | <b><math>\beta</math></b> | <b>SE</b> | <b>p-value</b> |
| Perceived stress during the last two weeks                                     | 0,025                     | 0,004     | <.0001         |
| Psychological support since COVID-19 pandemic beginning (yes)                  | 1,283                     | 0,390     | 0.0015         |
| Impact of public opinion judgement on work                                     | 0,441                     | 0,124     | 0.0009         |
| Marital status                                                                 | 0,332                     | 0,123     | 0.0084         |
| Work contract                                                                  | -1,011                    | 0,321     | 0.0033         |

**Table S3.** Symptoms of anxiety (GAD-2) stepwise regression analysis

| <i>Physicians</i>                                                              | <b>β</b> | <b>SE</b> | <b>p-value</b> |
|--------------------------------------------------------------------------------|----------|-----------|----------------|
| Perceived stress during the last two weeks                                     | 0,028    | 0,003     | <.0001         |
| Job satisfaction during the last two weeks                                     | -0,015   | 0,003     | <.0001         |
| <i>Nurses</i>                                                                  |          |           |                |
|                                                                                | <b>β</b> | <b>SE</b> | <b>p-value</b> |
| Perceived stress during the last two weeks                                     | 0,022    | 0,003     | <.0001         |
| Job satisfaction during the last two weeks                                     | -0,014   | 0,004     | 0.0004         |
| Impact of public opinion judgement on work                                     | 0,202    | 0,073     | 0.0040         |
| Lack of psychological and emotional support from both colleagues and superiors | 0,009    | 0,003     | 0.0362         |
| <i>Other Healthcare Professionals</i>                                          |          |           |                |
|                                                                                | <b>β</b> | <b>SE</b> | <b>p-value</b> |
| Perceived stress during the last two weeks                                     | 0,023    | 0,003     | <.0001         |
| Trust in Italian healthcare system                                             | -0,339   | 0,086     | 0.0488         |
| Impact of public opinion judgement on work                                     | 0,277    | 0,077     | 0.0266         |
| <i>Administrative staff</i>                                                    |          |           |                |
|                                                                                | <b>β</b> | <b>SE</b> | <b>p-value</b> |
| Perceived stress during the last two weeks                                     | 0,035    | 0,005     | <.0001         |
| Age                                                                            | 0,036    | 0,012     | 0.0472         |
| Lack of recreative activities after work                                       | 0,013    | 0,006     | 0.0519         |
| Prolonged DPI use                                                              | -0,016   | 0,006     | 0.0155         |

**Table S4.** Post-traumatic stress symptoms (IES-R) stepwise regression analysis

| <i>Physicians</i>                                                              | <b><math>\beta</math></b> | <b>SE</b> | <b>p-value</b> |
|--------------------------------------------------------------------------------|---------------------------|-----------|----------------|
| Perceived stress during the last two weeks                                     | 0,183                     | 0,040     | <.0001         |
| Fear of contracting COVID-19 after the vaccination                             | 0,123                     | 0,036     | 0.0001         |
| Psychological support since COVID-19 pandemic beginning (yes)                  | 6,261                     | 1,480     | 0.0002         |
| Age                                                                            | 0,229                     | 0,085     | 0.0053         |
| <i>Nurses</i>                                                                  | <b><math>\beta</math></b> | <b>SE</b> | <b>p-value</b> |
| Perceived stress during the last two weeks                                     | 0,160                     | 0,034     | <.0001         |
| Psychological support since COVID-19 pandemic beginning (yes)                  | 7,315                     | 1,468     | 0.0003         |
| Trust in Italian socioeconomic situation                                       | -3,100                    | 0,861     | 0.0060         |
| Lack of psychological and emotional support from both colleagues and superiors | 0,118                     | 0,029     | 0.0452         |
| Impact of neighbours judgement on work                                         | 2,396                     | 0,773     | 0.0069         |
| <i>Other Healthcare Professionals</i>                                          | <b><math>\beta</math></b> | <b>SE</b> | <b>p-value</b> |
| Perceived stress during the last two weeks                                     | 0,147                     | 0,039     | <.0001         |
| Job satisfaction during the last two weeks                                     | -0,156                    | 0,041     | 0.0020         |
| Lack of psychological and emotional support from both colleagues and superiors | 0,120                     | 0,031     | 0.0236         |
| Fear of contracting COVID-19 after the vaccination                             | 0,090                     | 0,039     | 0.0033         |
| Impact of patients judgement on work                                           | 3,259                     | 0,753     | <.0001         |
| <i>Administrative staff</i>                                                    | <b><math>\beta</math></b> | <b>SE</b> | <b>p-value</b> |
| More pressure or demands                                                       | 0,187                     | 0,044     | 0.0413         |
| Lack of recreative activities after work                                       | 0,301                     | 0,046     | 0.0002         |
| Lack of information and involvement in making decisions                        | 0,103                     | 0,052     | 0.0083         |
| Trust in Italian job perspectives                                              | -3,374                    | 1,058     | 0.0723         |

**Table S5.** Burnout symptoms (MBI-GS) stepwise regression analysis

| <i>Physicians</i>                                              | <b><math>\beta</math></b> | <b>SE</b> | <b>p-value</b> |
|----------------------------------------------------------------|---------------------------|-----------|----------------|
| Perceived stress during the last two weeks                     | 0,146                     | 0,028     | <.0001         |
| Lack of information and involvement in making decisions        | 0,061                     | 0,021     | 0.0122         |
| Psychological support since COVID-19 pandemic beginning (yes)  | 2,691                     | 1,021     | 0.0180         |
| Impact of COVID-19 on working (yes)                            | 2,635                     | 0,666     | <.0001         |
| <hr/>                                                          |                           |           |                |
| <i>Nurses</i>                                                  | <b><math>\beta</math></b> | <b>SE</b> | <b>p-value</b> |
| Perceived stress during the last two weeks                     | 0,140                     | 0,030     | 0.0046         |
| Fear of contracting COVID-19 after the vaccination             | -0,089                    | 0,032     | 0.0118         |
| Lack of information and involvement in making decisions        | 0,102                     | 0,026     | <.0001         |
| Clinical different opinions about patients' treatments         | 0,070                     | 0,027     | 0.0062         |
| <hr/>                                                          |                           |           |                |
| <i>Other Healthcare Professionals</i>                          | <b><math>\beta</math></b> | <b>SE</b> | <b>p-value</b> |
| Perceived stress during the last two weeks                     | 0,154                     | 0,034     | <.0001         |
| Job satisfaction during the last two weeks                     | -0,138                    | 0,035     | <.0001         |
| Lack of contact and support from both colleagues and superiors | 0,125                     | 0,031     | <.0001         |
| Routineous work                                                | -0,074                    | 0,032     | 0.0179         |
| <hr/>                                                          |                           |           |                |
| <i>Administrative staff</i>                                    | <b><math>\beta</math></b> | <b>SE</b> | <b>p-value</b> |
| Perceived stress during the last two weeks                     | 0,234                     | 0,047     | <.0001         |
| Trust in Italian job perspectives                              | -5,212                    | 1,342     | 0.0010         |
| Impact of public opinion judgement on work                     | 3,313                     | 1,562     | 0.0432         |
